# Supplementary material for: A neural mechanism for contextualizing fragmented inputs during naturalistic vision
Source: eLife journal article supplement (doi:10.7554/elife.48182), 2019-10-09
Supplement: supp [file elife-48182-supp-v1.zip]

Archive with 5 entries (5 files):
- elife_poa_e48182_Supplementary_file_1.docx
- elife_poa_e48182_Video_1.mov
- elife_poa_e48182_Supplementary_file_3.docx
- elife_poa_e48182_Supplementary_file_2.docx
- elife_poa_e48182_Transparent_Reporting_File.pdf
