# Supplementary material for: A neural mechanism for contextualizing fragmented inputs during naturalistic vision
Source: eLife journal article supplement (doi:10.7554/elife.48182), 2019-10-09
Supplement: supp [file elife-48182-supp-v1.zip › elife_poa_e48182_Supplementary_file_3.docx]

|  | vertical location | vertical location  (across indoor/outdoor) | category |
| --- | --- | --- | --- |
| original analysis | 62 (8) | 84 (16) | 62 (4) |
| DNN removed | 98 (36) | 170 (46) | *n.s.* |
